# Supplementary material for: Theoretical study of a p–n homojunction SiGe field-effect transistor via covalent functionalization
Source: Royal Society of Chemistry journal article supplement (doi:10.1039/d0ra01218a), 2020-01-01
Supplement: d0ra01218a1.pdf [file d0ra01218a1.pdf]

## Supporting Information

### Theoretical study of p-n homojunction SiGe field-effect transistor *via* covalent functionalization

Jianwei Zhao,<sup>a</sup> Na Cheng,<sup>a</sup> FeiFei Xia,<sup>b</sup> LianMei Liu<sup>a</sup> and Yuanyuan He<sup>\*a</sup>

<sup>a</sup>College of Material and Textile Engineering, Jiaying University, Jiaying 314001, Zhejiang, P. R. China.

<sup>b</sup>School of Chemical and Environmental Engineering, Jiangsu University of Technology, Changzhou 213001,

Jiangsu, P. R. China.

E-mail: [heyv@mail.zjxu.edu.cn](mailto:heyv@mail.zjxu.edu.cn).

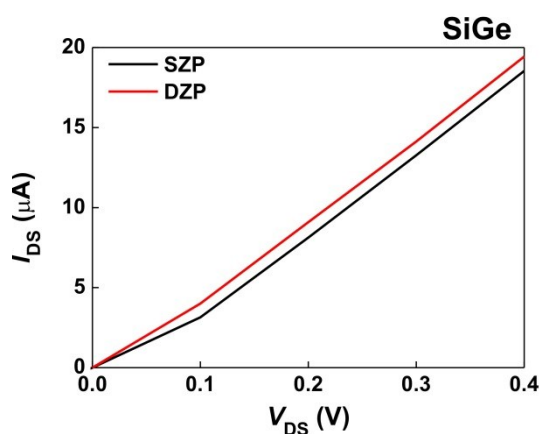

**Figure S1.** Output characteristic of pristine SiGe FET at  $V_G = 0$  V with single- $\zeta$ -polarized (SZP) and double- $\zeta$ -polarized (DZP) basis sets, respectively.
